# Supplementary material for: A sensitive electrochemical immunosensor for the detection of human chorionic gonadotropin based on a hierarchical nanoporous AuAg alloy
Source: Royal Society of Chemistry journal article supplement (doi:10.1039/c5ra24300a), 2015-12-14
Supplement: c5ra24300a1.pdf [file c5ra24300a1.pdf]

Supplementary Information for:

**A sensitive electrochemical immunosensor for the detection of human chorionic gonadotropin  
based on hierarchical nanoporous AuAg alloy**

*Dianyun Zhao<sup>a</sup>, Yang Yu<sup>b</sup>, and Caixia Xu<sup>a\*</sup>*

*<sup>a</sup>School of Chemistry and Chemical Engineering, University of Jinan, Jinan, 250022, China.*

*<sup>b</sup>Shandong Product Quality Inspection Research Institute, Jinan, 250102, China.*

*\*Email: [chm\\_xucx@ujn.edu.cn](mailto:chm_xucx@ujn.edu.cn) (C. Xu)*

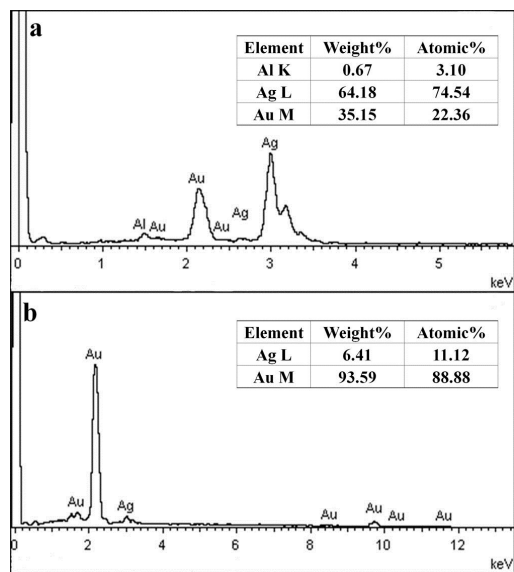

**Fig. S1.** EDS data of (a) the sample obtained by dealloying AuAgAl alloy in 1 M NaOH solution for 24 h and (b) the sample obtained by further annealing at 200 °C for 30 min and etched in concentrated HNO<sub>3</sub> for 1 h.

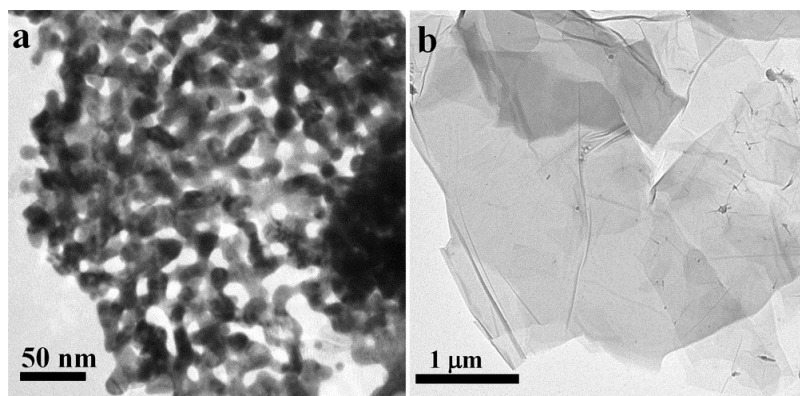

**Fig. S2.** TEM images of the (a) nanoporous Au and (b) GS.

**Table S1** The hCG detection in serum by the constructed immunosensor.

| Added hCG<br>(ng/mL) | Measured<br>(ng/mL) | RSD<br>(%, n=5) | Recovery<br>(%, n=5) |
|----------------------|---------------------|-----------------|----------------------|
| 1                    | 1.02                | 3.23            | 102                  |
| 5                    | 5.15                | 2.71            | 103                  |
| 10                   | 10.22               | 3.16            | 102.2                |
| 20                   | 19.23               | 1.82            | 96.15                |
